# Supplementary material for: Drug Off-Target Effects Predicted Using Structural Analysis in the Context of a Metabolic Network Model
Source: PLoS Comput Biol. 2010 Sep 23;6(9):e1000938. doi: 10.1371/journal.pcbi.1000938 (PMC2950675; doi:10.1371/journal.pcbi.1000938)
Supplement: Table S3 — Metabolic protein drug target predictions. All predicted metabolic protein targets for CETP inhibitors were subject to multiple levels of analysis to determine their possible causal role in adverse drug response phenotypes. An x indicates a positive result with respect to column labels representing each level of analysis. The proteins are sorted by the number of analyses suggesting a causal role. (0.03 MB XLS) [file pcbi.1000938.s009.xls]

## Sheet: Sheet1
Official Symbol	Protein Name	PDB ID	Gene ID	SMAP Prediction	Functional Site Overlap	Reduced Model Reactions Limited by Expression	Impacts Renal Function in Simulation	Stronger Drug Binding Affinity
PTGIS	prostaglandin I2 (prostacyclin) synthase	2IAG	5740	x	x	x	x	x
ACOX1	acyl-Coenzyme A oxidase 1, palmitoyl	1IS2a	51	x	x	x	x	x
AK3L1	adenylate kinase 3-like 1	2BBW	205	x	x	x	x
HAO2	hydroxyacid oxidase 2 (long chain)	1LTDa	51179	x	x	x	x
MT-COI	mitochondrially encoded cytochrome c oxidase III	1V54a	4512	x	x	x	x
UQCRC1	ubiquinol-cytochrome c reductase core protein I	1PP9a	7384	x	x	x	x
SLC4A1	solute carrier family 4, anion exchanger, member 1 (erythrocyte membrane protein band 3, Diego blood group)	1HYN	6521	x		x
HSD17B10	hydroxysteroid (17-beta) dehydrogenase 10	1U7T	3028	x	x			x
CRAT	carnitine acetyltransferase	1XMCa	1384	x	x			x
GLTP	glycolipid transfer protein	1TFJa	51228b	x	x			x
PDE10A	phosphodiesterase 10A	2OUN	10846	x	x			x
PFKFB1	6-phosphofructo-2-kinase/fructose-2,6-biphosphatase 1	1K6M	5207	x	x			x
TTPA	tocopherol (alpha) transfer protein	1OIP	7274b	x	x
UGP2	UDP-glucose pyrophosphorylase 2	2I5Ka	7360	x
PDE1C	phosphodiesterase 1C, calmodulin-dependent 70kDa	1LXS	5137	x
PCTP	phosphatidylcholine transfer protein	1LN1	58488b	x	x			x
CYP2C9	cytochrome P450, family 2, subfamily C, polypeptide 9	1R9O	1559	x	x			x
HMOX2	heme oxygenase (decycling) 2	2Q32	3163	x	x			x
IDO1	indoleamine 2,3-dioxygenase 1	2D0T	3620	x	x			x
STARD3	StAR-related lipid transfer (START) domain containing 3	1EM2	10948	x	x			x
PYCR1	pyrroline-5-carboxylate reductase 1	2IZZ	5831	x	x			x
CYP19A1	cytochrome P450, family 19, subfamily A, polypeptide 1	3EQM	1588	x	x			x
HAL	histidine ammonia-lyase	1B8Fa	3034	x	x			x
PFAS	phosphoribosylformylglycinamidine synthase	1T3Ta	5198	x	x			x
PPOX	protoporphyrinogen oxidase	2IVDa	5498	x	x			x
TDO2	tryptophan 2,3-dioxygenase	2NOXa	6999	x	x			x
INMT	indolethylamine N-methyltransferase	1VLMa	11185	x	x			x
DLAT	dihydrolipoamide S-acetyltransferase	3B8K	1737	x	x			x
DHODH	dihydroorotate dehydrogenase	2FPT	1723	x	x
HAO1	hydroxyacid oxidase (glycolate oxidase) 1	1LCOa	54363	x	x
HSD17B1	hydroxysteroid (17-beta) dehydrogenase 1	1I5R	3292	x	x
AANAT	arylalkylamine N-acetyltransferase	1KUXa	15	x
STS	steroid sulfatase (microsomal), isozyme S	1P49	412	x
CYP21A2	cytochrome P450, family 21, subfamily A, polypeptide 2	2GEG	1589	x
HNMT	histamine N-methyltransferase	1JQE	3176	x
HSD17B4	hydroxysteroid (17-beta) dehydrogenase 4	1IKT	3295	x
CHP	calcium binding protein P22	2E30	11261	x
COASY	Coenzyme A synthase	2F6Ra	80347	x
SLC2A7	solute carrier family 2 (facilitated glucose transporter), member 7	1YG7	155184	x
SLC2A5	solute carrier family 2 (facilitated glucose/fructose transporter), member 5	1YG1	6518	x
CSAD	cysteine sulfinic acid decarboxylase	2JIS	51380	x
a Non-human protein structures were mapped to human genes via BLAST against the human proteome and choosing the top hit only if it had E-value < 1E-50.
b Incomplete or incorrect gene-protein-reaction associations (GPRs) were associated with the correct gene IDs based on comparative BLAST results and gene functional annotation.
