# Supplementary material for: Drug Off-Target Effects Predicted Using Structural Analysis in the Context of a Metabolic Network Model
Source: PLoS Comput Biol. 2010 Sep 23;6(9):e1000938. doi: 10.1371/journal.pcbi.1000938 (PMC2950675; doi:10.1371/journal.pcbi.1000938)
Supplement: Table S4 — Summary and validation of gene deficiencies causing renal metabolic disorders. The complete list of gene deficiencies predicted to cause renal metabolic disorders is presented. Specific impacted renal secretions and reabsorptions are also displayed using metabolite abbreviations as represented in Recon1. Clinically observed phenotypes validating the association of these genetic deficiencies with predicted metabolic renal disorders found in the OMIM database and literature are noted. These validated predictions are listed first in the table, and the remaining predictions are sorted by the type of renal disorders caused by the gene deficiencies in simulation. (0.05 MB XLS) [file pcbi.1000938.s010.xls]

## Sheet: Sheet 1
Gene ID	Official Gene Symbol	Official Full Name	Secretions	Reabsorbtions	Validating OMIM Phenotypes	References
1594	CYP27B1	cytochrome P450, family 27, subfamily B, polypeptide 1	1a25dhvitd3	pro-La	#264700	(Kitanaka et al, 1998; Wang et al, 1998)
5740	PTGIS	prostaglandin I2 (prostacyclin) synthase	prostgi2		#145500	(Ito et al, 2007; Nakayama et al, 2002)
7498	XDH	xanthine dehydrogenase	urate	h	#278300	(Dickinson and Smellie, 1959)
4860	NP	nucleoside phosphorylase	urate	h	+164050	(Sasaki et al, 1998)
1644	DDC	dopa decarboxylase (aromatic L-amino acid decarboxylase)	trypta	glc;trp-L	#608643	(Hyland and Clayton, 1990)
1340	COX6B1	cytochrome c oxidase subunit Vib polypeptide 1 (ubiquitous)		cit;glc;ala-L;glu-L;pro-L;hco3	#220110	(Eshel et al, 1991; Zeviani et al, 1985)
126328	NDUFA11	NADH dehydrogenase (ubiquinone) 1 alpha subcomplex, 11, 14.7kDa		cit;glc;ala-L;glu-L;pro-L;hco3	#252010	(Moreadith et al, 1984)
4694	NDUFA1	NADH dehydrogenase (ubiquinone) 1 alpha subcomplex, 1, 7.5kDa		cit;glc;ala-L;glu-L;pro-L;hco3	#252010	(Moreadith et al, 1984)
4719	NDUFS1	NADH dehydrogenase (ubiquinone) Fe-S protein 1, 75kDa (NADH-coenzyme Q reductase)		cit;glc;ala-L;glu-L;pro-L;hco3	#252010	(Moreadith et al, 1984)
4720	NDUFS2	NADH dehydrogenase (ubiquinone) Fe-S protein 2, 49kDa (NADH-coenzyme Q reductase)		cit;glc;ala-L;glu-L;pro-L;hco3	#252010	(Moreadith et al, 1984)
4723	NDUFV1	NADH dehydrogenase (ubiquinone) flavoprotein 1, 51kDa		cit;glc;ala-L;glu-L;pro-L;hco3	#252010	(Moreadith et al, 1984)
4724	NDUFS4	NADH dehydrogenase (ubiquinone) Fe-S protein 4, 18kDa (NADH-coenzyme Q reductase)		cit;glc;ala-L;glu-L;pro-L;hco3	#252010	(Moreadith et al, 1984)
4726	NDUFS6	NADH dehydrogenase (ubiquinone) Fe-S protein 6, 13kDa (NADH-coenzyme Q reductase)		cit;glc;ala-L;glu-L;pro-L;hco3	#252010	(Moreadith et al, 1984)
5625	PRODH	proline dehydrogenase (oxidase) 1		glc;pro-L;hco3	#239500	(Jacquet et al, 2003; Humbertclaude et al, 2001; Perry et al, 1968)
27089	UQCRQ	ubiquinol-cytochrome c reductase, complex III subunit VII, 9.5kDa		cit;glc;ala-L;glu-L;pro-L;hco3	#124000	(de Lonlay et al, 2001)
7381	UQCRB	ubiquinol-cytochrome c reductase binding protein		cit;glc;ala-L;glu-L;pro-L;hco3	#124000	(de Lonlay et al, 2001)
2271	FH	fumarate hydratase		cit;ala-L;glu-L	#606812	(Zinn et al, 1986; Gellera et al, 1990)
6524	SLC5A2	solute carrier family 5 (sodium/glucose cotransporter), member 2		glc;glu-L	#233100	(van den Heuvel et al, 2002)
6505	SLC1A1	solute carrier family 1 (neuronal/epithelial high affinity glutamate transporter, system Xag), member 1		asp-L;glc;glu-L	222730	(Teijema et al, 1974)
6523	SLC5A1	solute carrier family 5 (sodium/glucose cotransporter), member 1		gthrd;h2o	#606824	(Elsas et al, 1970)
56301	SLC7A10	solute carrier family 7, (neutral amino acid transporter, y+ system) member 10		cit;glc;ala-L;gln-L;glu-L;glya;pro-L;ser-L;thr-L
6519	SLC3A1	solute carrier family 3 (cystine, dibasic and neutral amino acid transporters, activator of cystine, dibasic and neutral amino acid transport), member 1		cit;glc;ala-L;glu-L;glya;pro-L;ser-L
11136	SLC7A9	solute carrier family 7 (cationic amino acid transporter, y+ system), member 9		cit;glc;ala-L;glu-L;glya;pro-L;ser-L
4363	ABCC1	ATP-binding cassette, sub-family C (CFTR/MRP), member 1		pia;h
4514	MT-COI	mitochondrially encoded cytochrome c oxidase III		cit;glc;ala-L;glu-L;pro-L;hco3
4519	UQCRC1	mitochondrially encoded cytochrome b		cit;glc;ala-L;glu-L;pro-L;hco3
64078	SLC28A3	solute carrier family 28 (sodium-coupled nucleoside transporter), member 3	camp	pi;glc;h
2544	G6PT2	glucose-6-phosphatase, transport (phosphate/pyrophosphate) protein 2	camp	pi;glc;h
117247	SLC16A10	solute carrier family 16, member 10 (aromatic amino acid transporter)	trypta	glc;trp-L;tyr-L/
9615	GDA	guanine deaminase	urate	h
9058	SLC13A2	solute carrier family 13 (sodium-dependent dicarboxylate transporter), member 2		cit;ala-L
6392	SDHD	succinate dehydrogenase complex, subunit D, integral membrane protein		cit;ala-L;glu-L
1738	DLD	dihydrolipoamide dehydrogenase		cit;ala-L;glu-L
6389	SDHA	succinate dehydrogenase complex, subunit A, flavoprotein (Fp)		cit;ala-L;glu-L
6390	SDHB	succinate dehydrogenase complex, subunit B, iron sulfur (Ip)		cit;ala-L;glu-L
1743	DLST	dihydrolipoamide S-succinyltransferase (E2 component of 2-oxo-glutarate complex)		cit;ala-L;glu-L
6391	SDHC	succinate dehydrogenase complex, subunit C, integral membrane protein, 15kDa		cit;ala-L;glu-L
8050	PDHX	pyruvate dehydrogenase complex, component X		cit;ala-L;glu-L
8801	SUCLG2	succinate-CoA ligase, GDP-forming, beta subunit		cit;ala-L;glu-L
8802	SUCLG1	succinate-CoA ligase, alpha subunit		cit;ala-L;glu-L
2805	GOT1	glutamic-oxaloacetic transaminase 1, soluble (aspartate aminotransferase 1)		cit;ala-L;glu-L
50808	AK3	adenylate kinase 3		cit;ala-L;glu-L
10632	ATP5L	ATP synthase, H+ transporting, mitochondrial F0 complex, subunit G		cit;ala-L;pro-L
4905	NSF	N-ethylmaleimide-sensitive factor		cit;ala-L;pro-L
506	ATP5B	ATP synthase, H+ transporting, mitochondrial F1 complex, beta polypeptide		cit;ala-L;pro-L
521	ATP5I	ATP synthase, H+ transporting, mitochondrial F0 complex, subunit E		cit;ala-L;pro-L
5832	ALDH18A1	aldehyde dehydrogenase 18 family, member A1		cit;ala-L;pro-L
124935	SLC43A2	solute carrier family 43, member 2		cit;glc;ala-L;cys-L;gln-L;glu-L;gly;pro-L;ser-L;thr-L
6520	SLC3A2	solute carrier family 3 (activators of dibasic and neutral amino acid transport), member 2		cit;glc;ala-L;gln-L;glu-L;gly;pro-L;ser-L;thr-L
6576	SLC25A1	solute carrier family 25 (mitochondrial carrier; citrate transporter), member 1		cit;glc;ala-L;glu-L;hco3
3418	IDH2	isocitrate dehydrogenase 2 (NADP+), mitochondrial		cit;glc;ala-L;glu-L;hco3
50	ACO2	aconitase 2, mitochondrial		cit;glc;ala-L;glu-L;hco3
10975	UQCR	ubiquinol-cytochrome c reductase, 6.4kDa subunit		cit;glc;ala-L;glu-L;pro-L;hco3
125965	COX6B2	cytochrome c oxidase subunit VIb polypeptide 2 (testis)		cit;glc;ala-L;glu-L;pro-L;hco3
1327	COX4I1	cytochrome c oxidase subunit IV isoform 1		cit;glc;ala-L;glu-L;pro-L;hco3
1329	COX5B	cytochrome c oxidase subunit Vb		cit;glc;ala-L;glu-L;pro-L;hco3
1337	COX6A1	cytochrome c oxidase subunit VIa polypeptide 1		cit;glc;ala-L;glu-L;pro-L;hco3
1339	COX6A2	cytochrome c oxidase subunit VIa polypeptide 2		cit;glc;ala-L;glu-L;pro-L;hco3
1345	COX6C	cytochrome c oxidase subunit Vic		cit;glc;ala-L;glu-L;pro-L;hco3
1346	COX7A1	cytochrome c oxidase subunit VIIa polypeptide 1 (muscle)		cit;glc;ala-L;glu-L;pro-L;hco3
1347	COX7A2	cytochrome c oxidase subunit VIIa polypeptide 2 (liver)		cit;glc;ala-L;glu-L;pro-L;hco3
1349	COX7B	cytochrome c oxidase subunit VIIb		cit;glc;ala-L;glu-L;pro-L;hco3
1350	COX7C	cytochrome c oxidase subunit VIIc		cit;glc;ala-L;glu-L;pro-L;hco3
1351	COX8A	cytochrome c oxidase subunit 8A (ubiquitous)		cit;glc;ala-L;glu-L;pro-L;hco3
1537	CYC1	cytochrome c-1		cit;glc;ala-L;glu-L;pro-L;hco3
170712	COX7B2	cytochrome c oxidase subunit VIIb2		cit;glc;ala-L;glu-L;pro-L;hco3
341947	COX8C	cytochrome c oxidase subunit 8C		cit;glc;ala-L;glu-L;pro-L;hco3
374291	NDUFS7	NADH dehydrogenase (ubiquinone) Fe-S protein 7, 20kDa (NADH-coenzyme Q reductase)		cit;glc;ala-L;glu-L;pro-L;hco3
4512	MT-COI	mitochondrially encoded cytochrome c oxidase I		cit;glc;ala-L;glu-L;pro-L;hco3
4513	MT-CO2	mitochondrially encoded cytochrome c oxidase II		cit;glc;ala-L;glu-L;pro-L;hco3
4535	MT-ND1	mitochondrially encoded NADH dehydrogenase 1		cit;glc;ala-L;glu-L;pro-L;hco3
4536	MT-ND2	mitochondrially encoded NADH dehydrogenase 2		cit;glc;ala-L;glu-L;pro-L;hco3
4537	MT-ND3	mitochondrially encoded NADH dehydrogenase 3		cit;glc;ala-L;glu-L;pro-L;hco3
4538	MT-ND4	mitochondrially encoded NADH dehydrogenase 4		cit;glc;ala-L;glu-L;pro-L;hco3
4539	MT-ND4L	mitochondrially encoded NADH 4L		cit;glc;ala-L;glu-L;pro-L;hco3
4540	MTND5	mitochondrially encoded NADH dehydrogenase 5		cit;glc;ala-L;glu-L;pro-L;hco3
4541	MT-ND6	mitochondrially encoded NADH dehydrogenase 6		cit;glc;ala-L;glu-L;pro-L;hco3
4695	NDUFA2	NADH dehydrogenase (ubiquinone) 1 alpha subcomplex, 2, 8kDa		cit;glc;ala-L;glu-L;pro-L;hco3
4696	NDUFA3	NADH dehydrogenase (ubiquinone) 1 alpha subcomplex, 3, 9kDa		cit;glc;ala-L;glu-L;pro-L;hco3
4697	NDUFA4	NADH dehydrogenase (ubiquinone) 1 alpha subcomplex, 4, 9kDa		cit;glc;ala-L;glu-L;pro-L;hco3
4698	NDUFA5	NADH dehydrogenase (ubiquinone) 1 alpha subcomplex, 5, 13kDa		cit;glc;ala-L;glu-L;pro-L;hco3
4700	NDUFA6	NADH dehydrogenase (ubiquinone) 1 alpha subcomplex, 6, 14kDa		cit;glc;ala-L;glu-L;pro-L;hco3
4701	NDUFA7	NADH dehydrogenase (ubiquinone) 1 alpha subcomplex, 7, 14.5kDa		cit;glc;ala-L;glu-L;pro-L;hco3
4702	NDUFA8	NADH dehydrogenase (ubiquinone) 1 alpha subcomplex, 8, 19kDa		cit;glc;ala-L;glu-L;pro-L;hco3
4704	NDUFA9	NADH dehydrogenase (ubiquinone) 1 alpha subcomplex, 9, 39kDa		cit;glc;ala-L;glu-L;pro-L;hco3
4705	NDUFA10	NADH dehydrogenase (ubiquinone) 1 alpha subcomplex, 10, 42kDa		cit;glc;ala-L;glu-L;pro-L;hco3
4706	NDUFAB1	NADH dehydrogenase (ubiquinone) 1, alpha/beta subcomplex, 1, 8kDa		cit;glc;ala-L;glu-L;pro-L;hco3
4707	NDUFB1	NADH dehydrogenase (ubiquinone) 1 beta subcomplex, 1, 7kDa		cit;glc;ala-L;glu-L;pro-L;hco3
4708	NDUFB2	NADH dehydrogenase (ubiquinone) 1 beta subcomplex, 2, 8kDa		cit;glc;ala-L;glu-L;pro-L;hco3
4709	NDUFB3	NADH dehydrogenase (ubiquinone) 1 beta subcomplex, 3, 12kDa		cit;glc;ala-L;glu-L;pro-L;hco3
4710	NDUFB4	NADH dehydrogenase (ubiquinone) 1 beta subcomplex, 4, 15kDa		cit;glc;ala-L;glu-L;pro-L;hco3
4711	NDUFB5	NADH dehydrogenase (ubiquinone) 1 beta subcomplex, 5, 16kDa		cit;glc;ala-L;glu-L;pro-L;hco3
4713	NDUFB7	NADH dehydrogenase (ubiquinone) 1 beta subcomplex, 7, 18kDa		cit;glc;ala-L;glu-L;pro-L;hco3
4714	NDUFB8	NADH dehydrogenase (ubiquinone) 1 beta subcomplex, 8, 19kDa		cit;glc;ala-L;glu-L;pro-L;hco3
4715	NDUFB9	NADH dehydrogenase (ubiquinone) 1 beta subcomplex, 9, 22kDa		cit;glc;ala-L;glu-L;pro-L;hco3
4716	NDUFB10	NADH dehydrogenase (ubiquinone) 1 beta subcomplex, 10, 22kDa		cit;glc;ala-L;glu-L;pro-L;hco3
4717	NDUFC1	NADH dehydrogenase (ubiquinone) 1, subcomplex unknown, 1, 6kDa		cit;glc;ala-L;glu-L;pro-L;hco3
4718	NDUFC2	NADH dehydrogenase (ubiquinone) 1, subcomplex unknown, 2, 14.5kDa		cit;glc;ala-L;glu-L;pro-L;hco3
4722	NDUFS3	NADH dehydrogenase (ubiquinone) Fe-S protein 3, 30kDa (NADH-coenzyme Q reductase)		cit;glc;ala-L;glu-L;pro-L;hco3
4725	NDUFS5	NADH dehydrogenase (ubiquinone) Fe-S protein 5, 15kDa (NADH-coenzyme Q reductase)		cit;glc;ala-L;glu-L;pro-L;hco3
4728	NDUFS8	NADH dehydrogenase (ubiquinone) Fe-S protein 8, 23kDa (NADH-coenzyme Q reductase)		cit;glc;ala-L;glu-L;pro-L;hco3
4729	NDUFV2	NADH dehydrogenase (ubiquinone) flavoprotein 2, 24kDa		cit;glc;ala-L;glu-L;pro-L;hco3
51079	NDUFA13	NADH dehydrogenase (ubiquinone) 1 alpha subcomplex, 13		cit;glc;ala-L;glu-L;pro-L;hco3
55967	NDUFA12	NADH dehydrogenase (ubiquinone) 1 alpha subcomplex, 12		cit;glc;ala-L;glu-L;pro-L;hco3
7384	UQCRC1	ubiquinol-cytochrome c reductase core protein I		cit;glc;ala-L;glu-L;pro-L;hco3
7385	UQCRC2	ubiquinol-cytochrome c reductase core protein II		cit;glc;ala-L;glu-L;pro-L;hco3
7386	UQCRFS1	ubiquinol-cytochrome c reductase, Rieske iron-sulfur polypeptide 1		cit;glc;ala-L;glu-L;pro-L;hco3
7388	UQCRH	ubiquinol-cytochrome c reductase hinge protein		cit;glc;ala-L;glu-L;pro-L;hco3
84701	COX4I2	cytochrome c oxidase subunit IV isoform 2 (lung)		cit;glc;ala-L;glu-L;pro-L;hco3
9167	COX7A2L	cytochrome c oxidase subunit VIIa polypeptide 2 like		cit;glc;ala-L;glu-L;pro-L;hco3
9377	COX5A	cytochrome c oxidase subunit Va		cit;glc;ala-L;glu-L;pro-L;hco3
847	CAT	catalase		cit;glc;h;ala-L;glu-L;gly;pro-L;ser-L;hco3
6652	SORD	sorbitol dehydrogenase		glc
8402	SLC25A11	solute carrier family 25 (mitochondrial carrier; oxoglutarate carrier), member 11		glc;glu-L;hco3
9380	GRHPR	glyoxylate reductase/hydroxypyruvate reductase		glc;glu-L;ser-L
4907	NT5E	5'-nucleotidase, ecto (CD73)		glc;gthrd;h2o
6648	SOD2	superoxide dismutase 2, mitochondrial		glu-L
64080	RBKS	ribokinase		h
10840	ALDH1L1	aldehyde dehydrogenase 1 family, member L1		ser-L
a Red metabolites represent cryptic gene-deficient phenotypes predicted.
