# Supplementary material for: Drug Off-Target Effects Predicted Using Structural Analysis in the Context of a Metabolic Network Model
Source: PLoS Comput Biol. 2010 Sep 23;6(9):e1000938. doi: 10.1371/journal.pcbi.1000938 (PMC2950675; doi:10.1371/journal.pcbi.1000938)
Supplement: Table S5 — Clinical gene-deficient renal disorder benchmark data. The set of clinically-observed gene-deficient renal metabolic disorder phenotypes collected from the OMIM database are presented that were used to perform AROC analysis. Clinical positives are observed disorder phenotypes with respect to specific metabolite reabsorptions or secretions associated with a gene deficiency, and clinical negatives are disorder phenotypes that were clinically confirmed not to occur in association with a gene deficiency. (0.03 MB XLS) [file pcbi.1000938.s011.xls]

## Sheet: Sheet1
			Clinical Positives		Clinical Negatives
Gene ID	Official Gene Symbol	Official Full Name	Secretions	Reabsorbtions	Secretions	Reabsorbtions	Validating OMIM Phenotypes	References
1594	CYP27B1	cytochrome P450, family 27, subfamily B, polypeptide 1	1a25dhvitd3		25hvitd3		#264700	(Kitanaka et al, 1998; Wang et al, 1998)
5740	PTGIS	prostaglandin I2 (prostacyclin) synthase	prostgi2				#145500	(Ito et al, 2007; Nakayama et al, 2002)
7498	XDH	xanthine dehydrogenase	urate				#278300	(Dickinson and Smellie, 1959)
4860	NP	nucleoside phosphorylase	urate				+164050	(Sasaki et al, 1998)
1644	DDC	dopa decarboxylase (aromatic L-amino acid decarboxylase)	trypta (increased 5HTP excretion)	trp-L (increased 5HTP excretion)			#608643	(Hyland and Clayton, 1990)
1340	COX6B1	cytochrome c oxidase subunit Vib polypeptide 1 (ubiquitous)		glc;pi;ala-L,glu-L,pro-L(amino aciduria);hco3		lac-L	#220110	(Eshel et al, 1991; Zeviani et al, 1985)
126328	NDUFA11	NADH dehydrogenase (ubiquinone) 1 alpha subcomplex, 11, 14.7kDa		glc;cit;glu-L			#252010	(Moreadith et al, 1984)
4694	NDUFA1	NADH dehydrogenase (ubiquinone) 1 alpha subcomplex, 1, 7.5kDa		glc;cit;glu-L			#252010	(Moreadith et al, 1984)
4719	NDUFS1	NADH dehydrogenase (ubiquinone) Fe-S protein 1, 75kDa (NADH-coenzyme Q reductase)		glc;cit;glu-L			#252010	(Moreadith et al, 1984)
4720	NDUFS2	NADH dehydrogenase (ubiquinone) Fe-S protein 2, 49kDa (NADH-coenzyme Q reductase)		glc;cit;glu-L			#252010	(Moreadith et al, 1984)
4723	NDUFV1	NADH dehydrogenase (ubiquinone) flavoprotein 1, 51kDa		glc;cit;glu-L			#252010	(Moreadith et al, 1984)
4724	NDUFS4	NADH dehydrogenase (ubiquinone) Fe-S protein 4, 18kDa (NADH-coenzyme Q reductase)		glc;cit;glu-L			#252010	(Moreadith et al, 1984)
4726	NDUFS6	NADH dehydrogenase (ubiquinone) Fe-S protein 6, 13kDa (NADH-coenzyme Q reductase)		glc;cit;glu-L			#252010	(Moreadith et al, 1984)
5625	PRODH	proline dehydrogenase (oxidase) 1		pro-L			#239500	(Jacquet et al, 2003; Humbertclaude et al, 2001; Perry et al, 1968)
27089	UQCRQ	ubiquinol-cytochrome c reductase, complex III subunit VII, 9.5kDa		cit(TCA intermediates);glc;ala-L,glu-L,pro-L(amino aciduria)			#124000	(de Lonlay et al, 2001)
7381	UQCRB	ubiquinol-cytochrome c reductase binding protein		cit(TCA intermediates);glc;ala-L,glu-L,pro-L(amino aciduria)			#124000	(de Lonlay et al, 2001)
2271	FH	fumarate hydratase		glu-L			#606812	(Zinn et al, 1986; Gellera et al, 1990)
6519	SLC3A1	solute carrier family 3 (cystine, dibasic and neutral amino acid transporters, activator of cystine, dibasic and neutral amino acid transport), member 1		cys-L			#220100	(Harnevik et al, 2001)
6523	SLC5A1	solute carrier family 5 (sodium/glucose cotransporter), member 1		h2o		fru	#606824	(Elsas et al, 1970)
6524	SLC5A2	solute carrier family 5 (sodium/glucose cotransporter), member 2		glc			#233100	(van den Heuvel et al, 2002)
11136	SLC7A9	solute carrier family 7 (cationic amino acid transporter, y+ system), member 9		cys-L			#220100	(Feliubadaló et al, 1999)
4952	OCRL	oculocerebrorenal syndrome of Lowe		pi;ca2;(amino aciduria)			#300555;#309000	(Hoopes et al, 2005; Charnas et al, 1991; Matsuda et al, 1969)
6505	SLC1A1	solute carrier family 1 (neuronal/epithelial high affinity glutamate transporter, system Xag), member 1		glu-L;asp-L;glc			222730	(Teijema et al, 1974)
6521	SLC4A1	solute carrier family 4, anion exchanger, member 1 (erythrocyte membrane protein band 3, Diego blood group)		hco3;k			#179800;#611590	(Randall 1967; Tanphaichitr et al, 1998)
6559	SLC12A3	solute carrier family 12 (sodium/chloride transporters), member 3		k	1a25dhvitd3		#263800	(Ng et al, 2006)
8671	SLC4A4	solute carrier family 4, sodium bicarbonate cotransporter, member 4		hco3			#604278	(Igarashi et al, 2001)
